# Supplementary material
Source: PubMed Central journal article supplement (PMC2628721)

**A** Overexpression in primary human fibroblasts

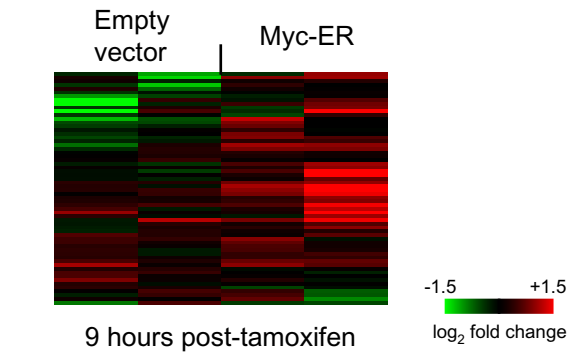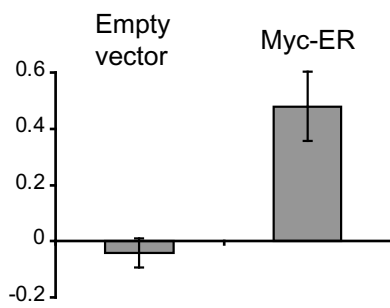

**B** Overexpression in nontransformed human breast cell line

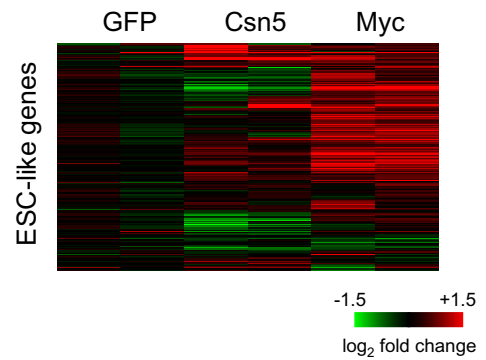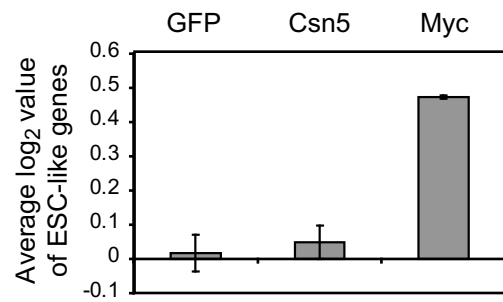

**C** Overexpression in pancreatic beta cells from *pIns-Myc-ER* transgenic mouse

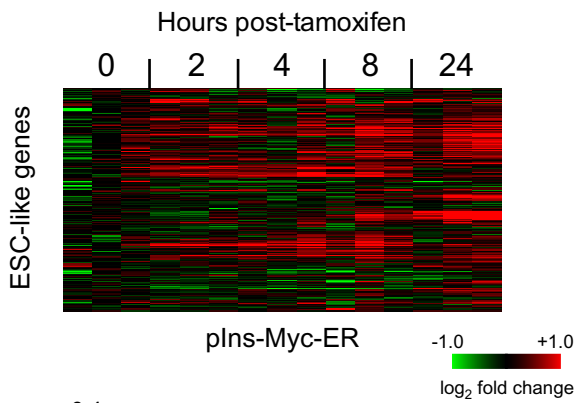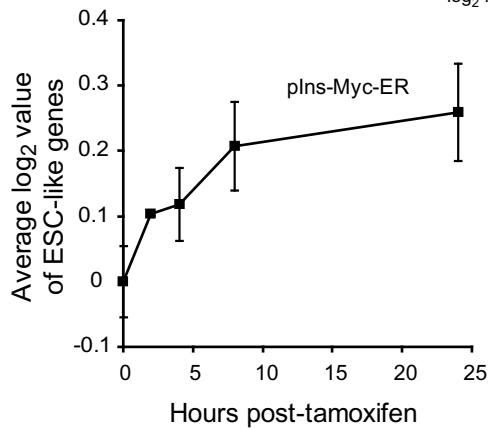

Supplement: NIHMS80252-supplement-SuppFig2.pdf [file NIHMS80252-supplement-SuppFig2.pdf]
