# Supplementary material
Source: PubMed Central journal article supplement (PMC2628721)

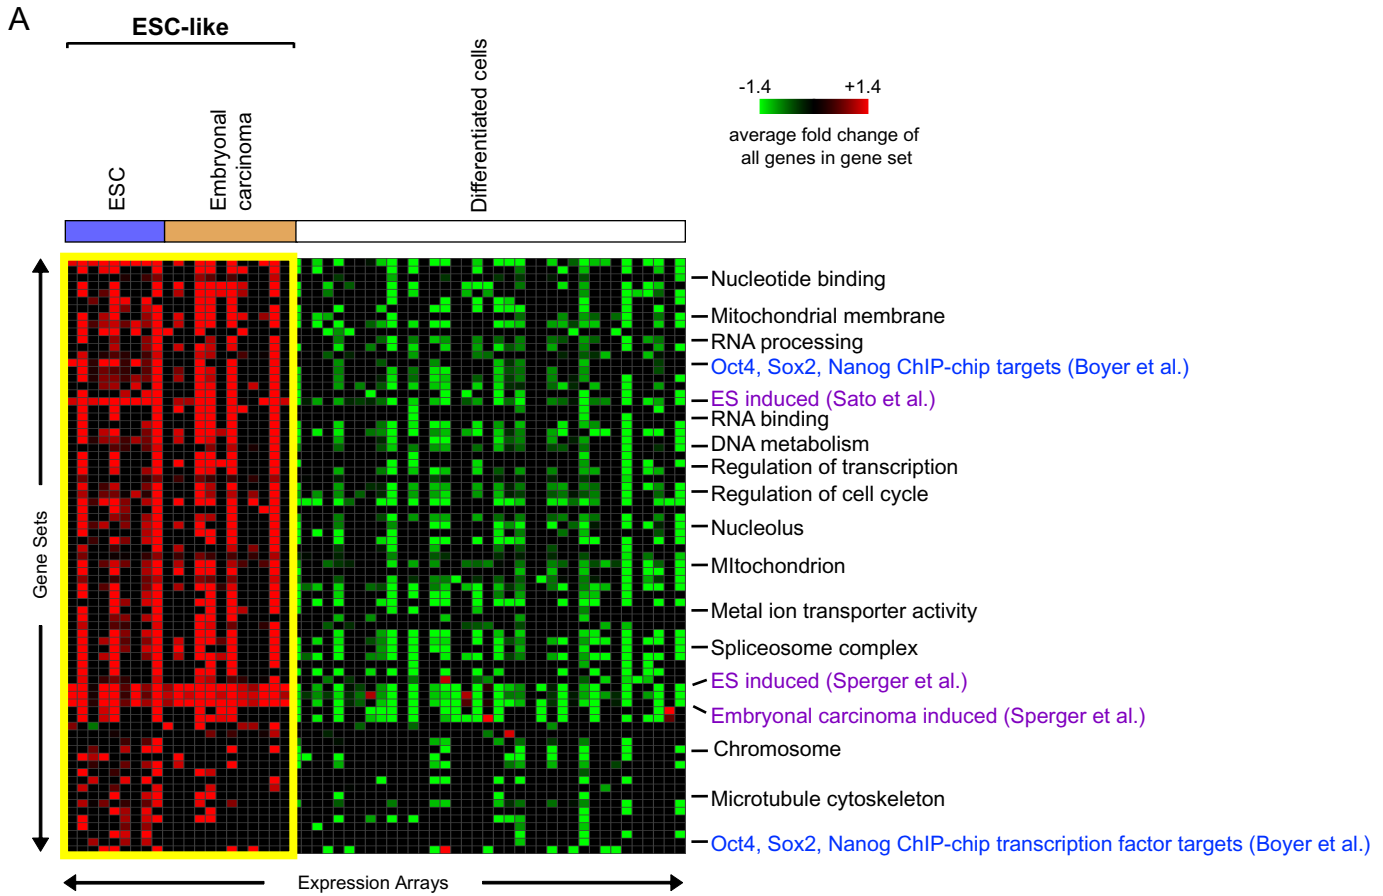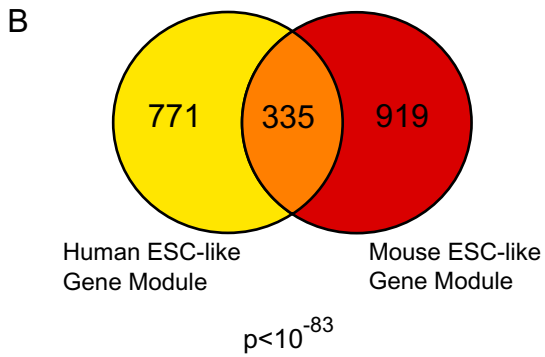

Supplement: NIHMS80252-supplement-SuppFig1.pdf [file NIHMS80252-supplement-SuppFig1.pdf]

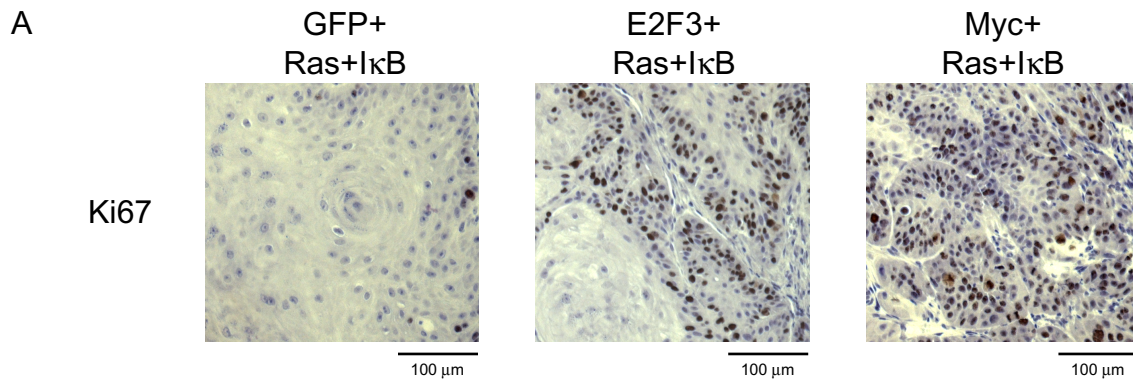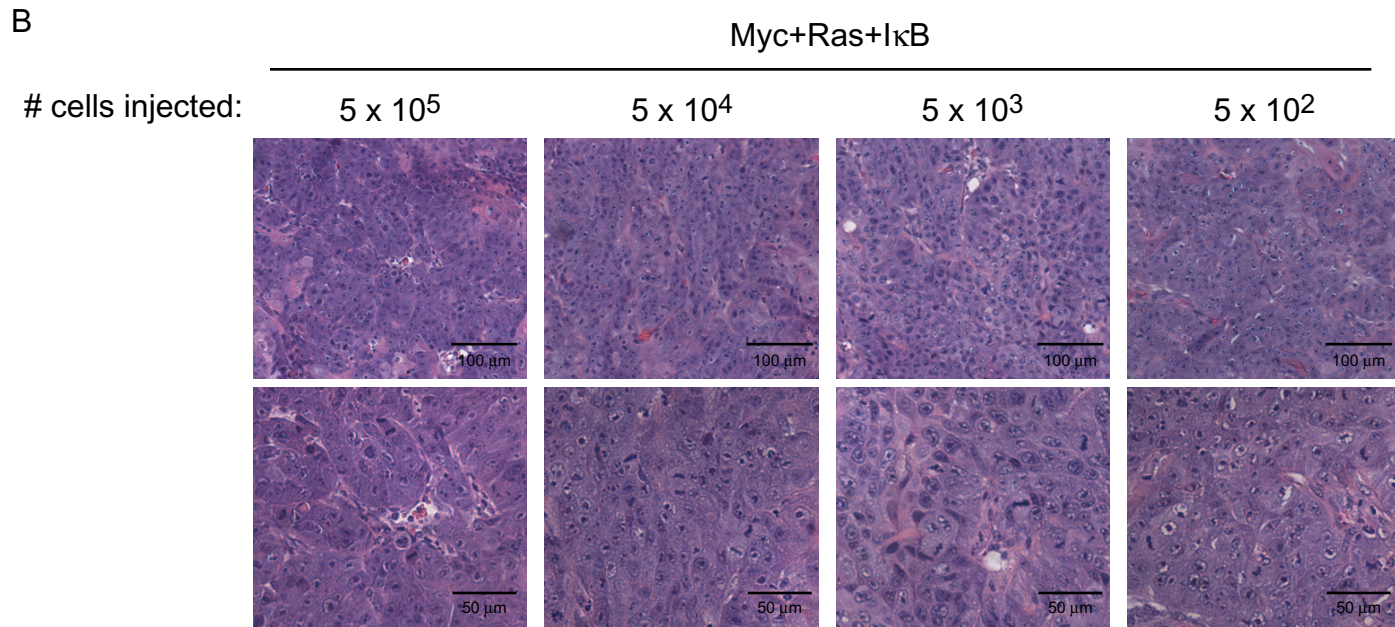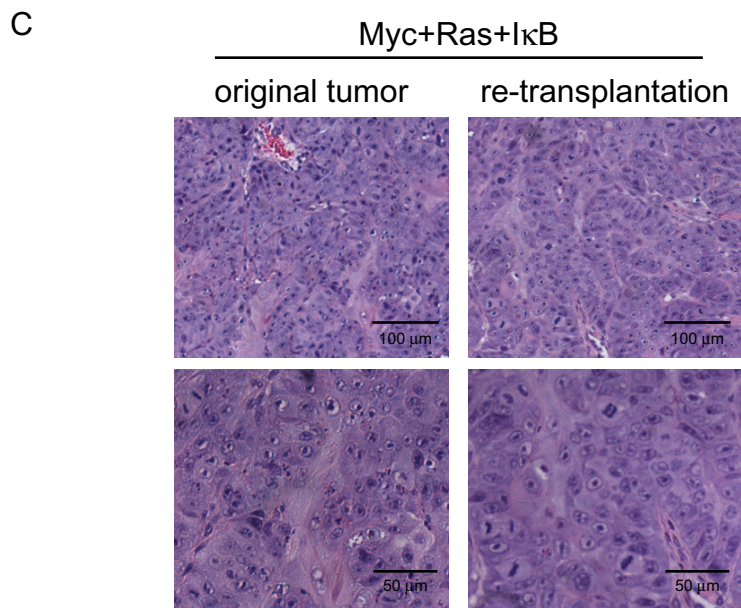

Supplement: NIHMS80252-supplement-SuppFig3.pdf [file NIHMS80252-supplement-SuppFig3.pdf]

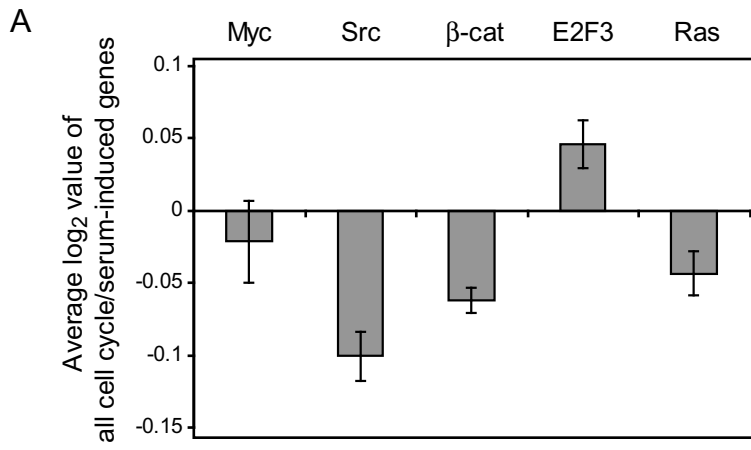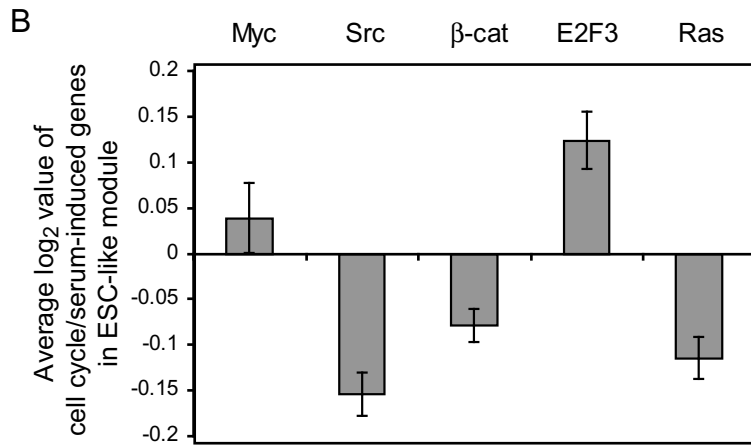

Supplement: NIHMS80252-supplement-SuppFig4.pdf [file NIHMS80252-supplement-SuppFig4.pdf]
